# Supplementary material for: Branchial Cilia and Sperm Flagella Recruit Distinct Axonemal Components
Source: PLoS One. 2015 May 11;10(5):e0126005. doi: 10.1371/journal.pone.0126005 (PMC4427456; doi:10.1371/journal.pone.0126005)
Supplement: S4 Table — (XLS) [file pone.0126005.s005.xls]

## Sheet: flagella
Table S4. Proteins present predominantly in sperm flagella (including other information not appeared in Table 2).
Category	ID	Normalized Quantity		f/c b	Description	Numbers of 2DE spots	Putative human homolog	Ci/Hs E-value	Putative Chlamydomonas homolog	Ci/Cr E-value	Putative Arabidopsis homolog	Ci/Ar E-value
		flagella	cilia
Outer arm dynein	KH.C9.590.v1.A.ND1-1	57429.1	0	-	axonemal p66.0 (Axp66.0)	1	NP_689804.1	3e-97	XP_001701436.1	9e-75	-	-
	KH.L76.16.v1.B.SL1-1	9122	0	-	DC2-related axonemal dynein intermediate chain 5 (IC5)	3	NP_689804.1	4e-54	XP_001701436.1	2e-53	-	-
	KH.C10.75.v1.A.ND1-1	84248.2	14812	5.68783	calaxin	1	NP_078869.1	1e-79	XP_001696107.1	2e-13	NP_567492.1	2e-17
Cytoskeleton	KH.L119.32.v1.A.ND1-1	596202	0	-	alpha-tubulin	1	NP_005992.1	0	XP_001691876.1	0	NP_171974.1	0
	KH.C9.606.v1.A.SL1-1	360411	0	-	beta-tubulin	1	NP_006079.1	0	XP_001693997.1	0	NP_196786.1	0
	KH.C3.563.v1.C.SL1-1	40638.2	0	-	actin	1	NP_001092.1	0	XP_001699068.1	0	NP_566988.1	0
Other axonemal structures	KH.C9.651.v1.A.ND1-1	2130.07	0	-	similar to predicted protein (tektin-like) (TD20)	1	NP_775753.2	2e-45	-	-	-	-
	KH.C11.654.v1.C.ND1-1	1667.11	0	-	outer dense fiber protein 3 (ODF3) (Shippo1) (TD11)	1	NP_444510.2	2e-58	-	-	-	-
	KH.C7.124.v1.A.ND1-1	2528	0	-	kinesin-like protein KIF9 isoform 2	2	NP_878905.2	0	XP_001701617.1	1e-127	NP_180430.2	2e-54
	KH.C14.267.v1.A.ND1-1	13134.4	0	-	no hit found (TD01)	1	CAD92530.1	8e-11	-	-	-	-
	KH.C9.376.v1.A.ND1-1	37374.7	4431.67	8.43355	armadillo repeat containing 3 (ARM94)	1	NP_775104.2	0	XP_001703701.1	1e-12	NP_196746.2	1e-17
Signaling and regulation	KH.C8.38.v7.A.SL4-2	2255.54	0	-	cAMP-dependent protein kinase, catalytic subunit a	1	NP_002721.1	0	XP_001699230.1	6e-98	NP_187484.1	4e-81
	KH.L61.1.v6.A.SL2-2	77021.8	0	-	cAMP-dependent protein kinase, regulatory, type II, a A	1	NP_002727.2	3e-118	XP_001700571.1	3e-44	NP_001189557.1	5e-25
	KH.C1.709.v1.A.ND1-1	9944.25	0	-	enkurin, TRPC channel interacting protein	1	NP_659447.1	5e-105	XP_001694675.1	2e-40	-	-
	KH.C12.587.v1.A.SL1-1	12707.9	0	-	rab GDP dissociation inhibitor alpha	1	NP_001484.1	0	XP_001694920.1	1e-176	NP_196517.3	1e-175
	KH.C3.725.v1.A.ND1-1	2118.07	0	-	testis-specific serine/threonine-protein kinase 2 (TD12)	1	NP_443732.3	4e-78	XP_001693723.1	4e-46	NP_974375.1	1e-56
	KH.C3.239.v1.A.SL1-1	17795	0	-	apoptosis-inducing factor 2	2	NP_116186.1	2e-71	XP_001703056.1	3e-29	NP_680200.1	1e-39
Metabolism	JGI_271161	23866	3111	7.67149	phosphoglucose isomerase	2	NP_000166.2	0	XP_001703279.1	8e-144	NP_199088.1	1e-150
	KH.C1.780.v1.A.SL1-1	9912	0	-	transketolase	3	NP_001055.1	0	XP_001701881.1	4e-32	NP_001190145.1	2e-43
	KH.C3.276.v1.A.SL1-1	4909.98	0	-	aconitate hydratase, mitochondrial	1	NP_001089.1	0	XP_001689702.1	0	NP_567763.2	8e-61
	KH.C11.121.v1.A.ND2-1	109021	19368	5.62892	glyceraldehyde-3-phosphate dehydrogenase	2	NP_002037.2	0	XP_001703199.1	5e-157	NP_173080.1	5e-179
	KH.C11.643.v1.A.ND1-1	4372.57	0	-	Cytochrome b-c1 complex subunit 2, mitochondrial	1	NP_003357.2	4e-65	XP_001691043.1	2e-19	NP_175610.1	9e-36
	KH.C14.296.v1.A.SL1-1	21451	1294	16.5773	phosphoglycerate kinase	1	NP_000282.1	0	XP_001699523.1	1e-123	NP_187884.1	2e-125
	KH.C14.422.v1.A.SL2-1	2422.29	0	-	isocitrate dehydrogenase 3 (NAD+) alpha	1	NP_005521.1	0	XP_001694857.1	3e-148	NP_568113.1	2e-149
	KH.C4.301.v1.A.ND1-1	863.69	0	-	glucose-6-phosphate dehydrogenase	1	NP_001035810.1	0	XP_001697245.1	1e-88	NP_198892.1	0
	KH.C5.392.v2.A.ND1-1	4094.33	0	-	isocitrate dehydrogenase 3 (NAD+) beta	1	NP_008830.2	4e-167	XP_001694857.1	1e-117	NP_195252.1	7e-119
	KH.C5.45.v1.A.SL1-1	3216.19	0	-	glutamate dehydrogenase (NADP(+))	1	NP_036216.2	4e-41	XP_001702270.1	1e-51	NP_175583.2	4e-134
	KH.C6.140.v2.A.ND1-1	6067.8	0	-	similar to prolyl-tRNA synthetase isoform 1	1	NP_001688.1	1e-43	XP_001695985.1	6e-20	NP_196849.1	2e-27
	KH.C7.586.v2.A.SL1-1 a	52429	1028.81	50.9609	glycerol-3-phosphate dehydrogenase 1b	3	NP_005267.2	4e-166	XP_001702598.1	4e-102	NP_198877.1	1e-109
	KH.C8.371.v2.A.SL1-2	15337.8	0	-	alpha-enolase	1	NP_001419.1	0	XP_001702971.1	0	NP_181192.1	0
	KH.C9.285.v1.A.SL2-1	4085	0	-	6-phosphofructokinase, muscle type	2	NP_001160158.1	0	XP_001694148.1	5e-07	NP_194651.1	6e-15
	KH.C9.421.v2.A.ND1-1	2363.99	0	-	adenylate kinase isoenzyme 1	1	NP_000467.1	1e-81	XP_001690042.1	6e-59	NP_850867.1	2e-57
Table 2. continued.
	KH.L147.31.v1.A.ND1-1	8064.04	0	-	glycogen phosphorylase	1	NP_002853.2	0	XP_001694015.1	0	NP_190281.1	0
	KH.L170.47.v3.A.SL1-1	134589	1833	73.4255	fructose bisphosphate aldolase	3	NP_005156.1	0	XP_001700659.1	5e-120	NP_190861.1	4e-146
	KH.L65.8.v1.A.ND1-1	6016.68	0	-	glutaredoxin-1	1	NP_001166984.1	1e-10	XP_001698084.1	1e-35	NP_192595.4	2e-54
	KH.C4.285.v1.A.ND1-1	18741.5	763.502	24.5468	creatine kinase Mt-CK3	1	NP_001816.2	0	-	-	-	-
	KH.C5.297.v2.A.ND1-2	35321.4	2579.99	13.6905	Phosphoglycerate mutase 1	1	NP_000281.2	1e-93	XP_001703522.1	1e-65	NP_564161.1	2e-45
	KH.C8.540.v2.A.SL1-1	13334.2	863.401	15.4438	Purine nucleoside phosphorylase	1	NP_000261.2	2e-99	-	-	-	-
	KH.C2.265.v1.A.SL2-1	28952.6	3977.2	7.27965	pyruvate kinase, muscle	1	NP_002645.3	0	XP_001693008.1	1e-140	NP_200446.1	8e-144
Uncharacterized proteins	KH.C1.906.v1.A.ND1-1	2256.47	0	-	similar to predicted protein	1	NP_659454.2	1e-21	-	-	-	-
	KH.C10.387.v1.A.ND1-1	23754	0	-	similar to RIKEN cDNA 1700009P17 gene	2	NP_001013647.2	4e-35	-	-	-	-
	KH.C12.378.v1.A.SL1-1a	27147.8	2088.8	12.9969	similar to predicted protein	1	NP_001116433.1	2e-31	-	-	-	-
	KH.C11.252.v1.A.SL2-1	1552.54	0	-	EH domain-containing protein 1	1	NP_006786.2	0	-	-	NP_567299.2	1e-146
	KH.C14.63.v2.A.SL2-1	47649.9	0	-	similar to Uncharacterized protein C13orf26	1	NP_689538.1	2e-27	-	-	-	-
	KH.C2.182.v1.A.ND1-1	1538.1	0	-	similar to predicted protein	1	NP_940936.2	1e-15	-	-	-	-
	KH.C2.832.v1.A.ND1-1	3386.06	0	-	similar to leucine rich repeat containing 51	1	NP_660352.1	2e-59	XP_001703288.1	1e-33	-	-
	KH.C8.833.v1.A.ND1-1	27376	0	-	EF-hand domain-containing family member B	5	NP_653316.3	8e-120	-	-	-	-
	KH.C8.769.v1.A.SL1-1	6168.67	0	-	leucine rich repeat containing 34	1	NP_001166250.1	3e-126	XP_001690380.1	2e-19	NP_563871.1	4e-27
	KH.C9.681.v1.A.ND1-1	34458	0	-	armadillo repeat containing 4	3	NP_060546.2	0	XP_001703701.1	4e-09	NP_566029.1	6e-17
	KH.L61.15.v1.A.ND1-1	8183	0	-	similar to MORN repeat containing 5	1	NP_940871.2	6e-37	XP_001697577.1	1e-10	NP_565799.1	4e-11
	KH.S776.2.v1.B.ND1-1	1022	0	-	growth arrest-specific 8	2	NP_001472.1	0	XP_001697295.1	1e-129	-	-
a Protein spots were detected by 2DE for both branchial cilia and sperm flagella, but either of them could not been identified by MS analysis.
b Ratio of normalized quantity in sperm flagella against that in branchial cilia.
